# Supplementary material for: Experimental Evaluation of Quantum Dots and Antibodies Conjugation by Surface Plasmon Resonance Spectroscopy
Source: MDPI journal article supplement (doi:10.3390/ijms232012626), 2022-10-20
Supplement: s1 [file s1]

# Experimental Evaluation of Quantum Dots and Antibodies Conjugation by Surface Plasmon Resonance Spectroscopy

Anton Popov <sup>1,2\*</sup>, Viktorija Lisyte <sup>2</sup>, Asta Kausaite-Minkstimiene <sup>1,2</sup>, Eiva Bernotiene <sup>3,4</sup>,  
Almira Ramanaviciene <sup>1,2\*</sup>

<sup>1</sup> Department of Immunology, State Research Institute Centre for Innovative Medicine, Santariskiu Str. 5, LT-08406 Vilnius, Lithuania

<sup>2</sup> NanoTechnas—Center of Nanotechnology and Materials Science, Institute of Chemistry, Faculty of Chemistry and Geosciences, Vilnius University, Naugarduko Str. 24, LT-03225 Vilnius, Lithuania

<sup>3</sup> Department of Regenerative Medicine, State Research Institute Centre for Innovative Medicine, Santariskiu Str. 5, LT-08406 Vilnius, Lithuania

<sup>4</sup> Department of Chemistry and Bioengineering, The Faculty of Fundamental Sciences, Vilnius Gediminas Technical University, Vilnius-Tech, LT-10223 Vilnius, Lithuania

\* Correspondence: anton.popov@chgf.vu.lt (A.P.); almira.ramanaviciene@chf.vu.lt (A.R.)

Supplementary data

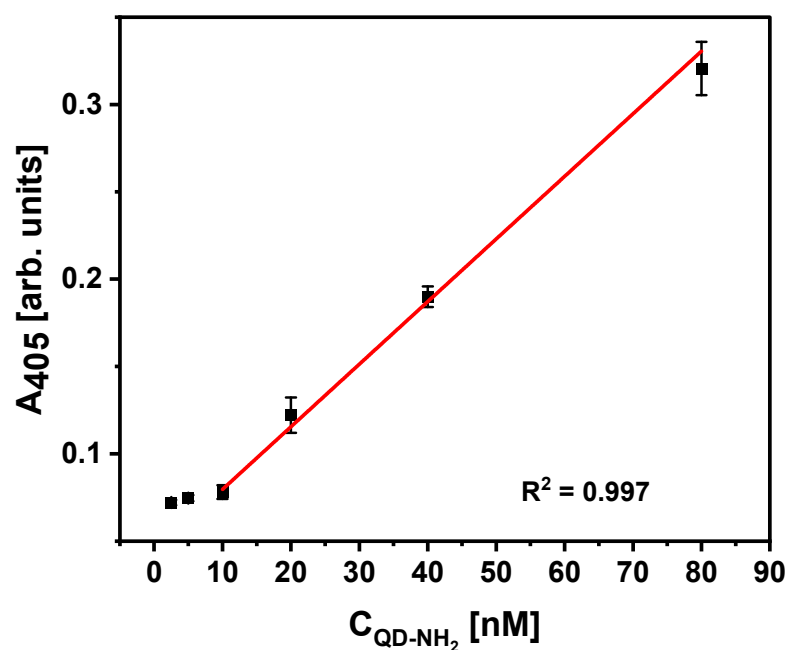

Figure S1. Calibration curve of QDs-NH<sub>2</sub> present in the solution.

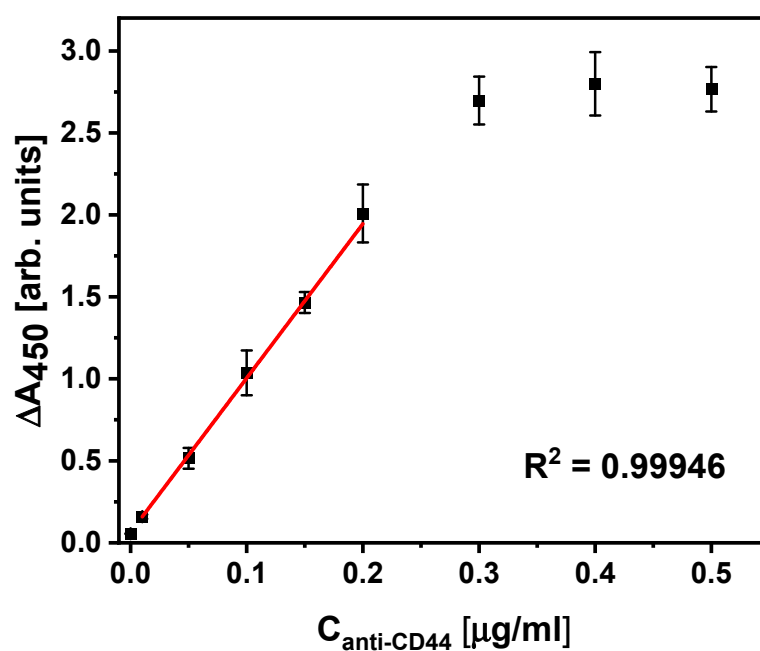

**Figure S2.** The calibration curve for detection of anti-CD44 antibody using direct ELISA format.

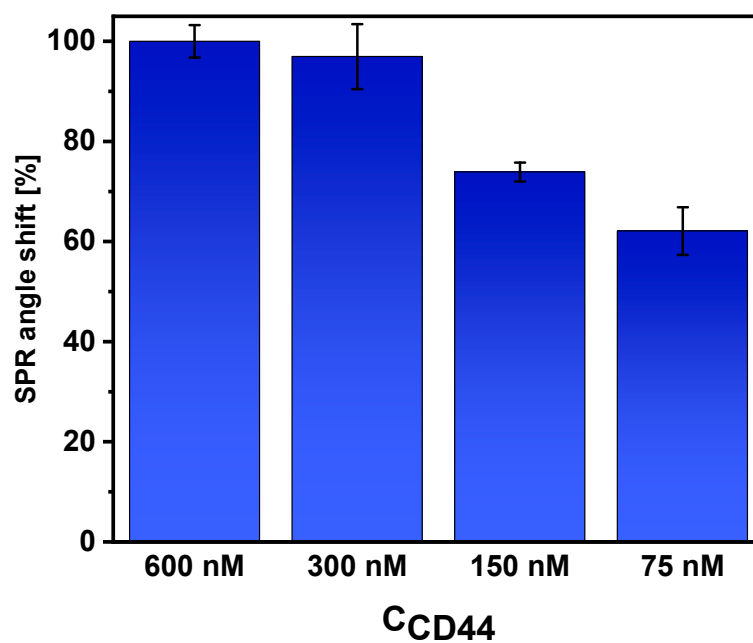

**Figure S3.** Interaction of QDs-NH<sub>2</sub> : anti-CD44 conjugates with CD44 biomarker, immobilized on the surface of sensor disk using initial CD44 concentrations of 75, 150, 300, and 600 nM.
